# Supplementary material for: Transcriptomic profiling revealed important roles of amino acid metabolism in fruiting body formation at different ripening times in Hypsizygus marmoreus
Source: Front Microbiol. 2023 Apr 25;14:1169881. doi: 10.3389/fmicb.2023.1169881 (PMC10167310; doi:10.3389/fmicb.2023.1169881)
Supplement: Supplementary file 3 [file Table_3.XLSX]

## Sheet: 30 vs 110
PathwayID	Pathway	Level1	Level2	Up_number	Down_number	DEG_number	total_number	Pvalue	FDR	Up_gene	Down_gene	URL
ko00410	beta-Alanine metabolism	Metabolism	Metabolism of other amino acids	2	5	7	23	0.000185479	0.0142819	Hypma_013261,Hypma_013259	Hypma_012533,Hypma_008015,Hypma_006158,Hypma_002091,Hypma_013449	http://www.kegg.jp/kegg-bin/show_pathway?map00410/K00276%09%23FFFFFF,green/K00129%09%23FFFFFF,green/K00128%09%23FFFFFF,green/K07511%09%23FFFFFF,green/K13366%09%23FFFFFF,red/K00823%09%23FFFFFF,green/
ko00010	Glycolysis / Gluconeogenesis	Metabolism	Carbohydrate metabolism	2	7	9	44	0.000612232	0.0235709	Hypma_009729,Hypma_000517	Hypma_012533,Hypma_002091,Hypma_002245,Hypma_000387,Hypma_011602,Hypma_015512,Hypma_003557	http://www.kegg.jp/kegg-bin/show_pathway?map00010/K01810%09%23FFFFFF,green/K03841%09%23FFFFFF,green/K01610%09%23FFFFFF,green/K01792%09%23FFFFFF,green/K00161%09%23FFFFFF,green/K13953%09%23FFFFFF,red/K00002%09%23FFFFFF,red/K00129%09%23FFFFFF,green/K00128%09%23FFFFFF,green/
ko00680	Methane metabolism	Metabolism	Energy metabolism	0	6	6	24	0.00170958	0.0341329	-	Hypma_009009,Hypma_010797,Hypma_015590,Hypma_011602,Hypma_011943,Hypma_007750	http://www.kegg.jp/kegg-bin/show_pathway?map00680/K17066%09%23FFFFFF,green/K00830%09%23FFFFFF,green/K00058%09%23FFFFFF,green/K03841%09%23FFFFFF,green/K00122%09%23FFFFFF,green/
ko01040	Biosynthesis of unsaturated fatty acids	Metabolism	Lipid metabolism	1	5	6	25	0.00214522	0.0341329	Hypma_003909	Hypma_001789,Hypma_014461,Hypma_003453,Hypma_002922,Hypma_014463	http://www.kegg.jp/kegg-bin/show_pathway?map01040/K07513%09%23FFFFFF,green/K10256%09%23FFFFFF,purple/
ko00350	Tyrosine metabolism	Metabolism	Amino acid metabolism	2	3	5	18	0.00254331	0.0341329	Hypma_012178,Hypma_009729	Hypma_010235,Hypma_002091,Hypma_013449	http://www.kegg.jp/kegg-bin/show_pathway?map00350/K13953%09%23FFFFFF,red/K00276%09%23FFFFFF,green/K00129%09%23FFFFFF,green/K00505%09%23FFFFFF,red/K00838%09%23FFFFFF,green/
ko00630	Glyoxylate and dicarboxylate metabolism	Metabolism	Carbohydrate metabolism	0	6	6	26	0.00265971	0.0341329	-	Hypma_009009,Hypma_000863,Hypma_002563,Hypma_006218,Hypma_007750,Hypma_005309	http://www.kegg.jp/kegg-bin/show_pathway?map00630/K01455%09%23FFFFFF,green/K00830%09%23FFFFFF,green/K01637%09%23FFFFFF,green/K01638%09%23FFFFFF,green/K03781%09%23FFFFFF,green/K00122%09%23FFFFFF,green/
ko00520	Amino sugar and nucleotide sugar metabolism	Metabolism	Carbohydrate metabolism	4	6	10	66	0.00343701	0.0378071	Hypma_003279,Hypma_001039,Hypma_007467,Hypma_007440	Hypma_011825,Hypma_005307,Hypma_013835,Hypma_014891,Hypma_015338,Hypma_000387	http://www.kegg.jp/kegg-bin/show_pathway?map00520/K01810%09%23FFFFFF,green/K00698%09%23FFFFFF,green/K00849%09%23FFFFFF,green/K01209%09%23FFFFFF,red/K00326%09%23FFFFFF,green/K01183%09%23FFFFFF,purple/
ko00910	Nitrogen metabolism	Metabolism	Energy metabolism	1	4	5	20	0.00419549	0.0403816	Hypma_015176	Hypma_005776,Hypma_014717,Hypma_006218,Hypma_014174	http://www.kegg.jp/kegg-bin/show_pathway?map00910/K00262%09%23FFFFFF,green/K01455%09%23FFFFFF,green/K10534%09%23FFFFFF,green/K01673%09%23FFFFFF,purple/
ko00480	Glutathione metabolism	Metabolism	Metabolism of other amino acids	2	4	6	29	0.00476183	0.0407401	Hypma_007653,Hypma_015552	Hypma_014954,Hypma_010269,Hypma_005415,Hypma_000264	http://www.kegg.jp/kegg-bin/show_pathway?map00480/K00799%09%23FFFFFF,green/K00681%09%23FFFFFF,red/K01469%09%23FFFFFF,green/K11204%09%23FFFFFF,red/
ko00380	Tryptophan metabolism	Metabolism	Amino acid metabolism	0	6	6	32	0.00788639	0.0607252	-	Hypma_012533,Hypma_008015,Hypma_014940,Hypma_005956,Hypma_005309,Hypma_010235	http://www.kegg.jp/kegg-bin/show_pathway?map00380/K00452%09%23FFFFFF,green/K00128%09%23FFFFFF,green/K00463%09%23FFFFFF,green/K00838%09%23FFFFFF,green/K03781%09%23FFFFFF,green/K07511%09%23FFFFFF,green/
ko00071	Fatty acid degradation	Metabolism	Lipid metabolism	1	4	5	24	0.00956664	0.0669665	Hypma_009729	Hypma_012533,Hypma_008015,Hypma_011560,Hypma_002922	http://www.kegg.jp/kegg-bin/show_pathway?map00071/K13239%09%23FFFFFF,green/K13953%09%23FFFFFF,red/K07513%09%23FFFFFF,green/K00128%09%23FFFFFF,green/K07511%09%23FFFFFF,green/
ko00260	Glycine, serine and threonine metabolism	Metabolism	Amino acid metabolism	1	6	7	44	0.0105446	0.0676613	Hypma_006680	Hypma_009009,Hypma_015590,Hypma_004182,Hypma_009605,Hypma_006682,Hypma_013449	http://www.kegg.jp/kegg-bin/show_pathway?map00260/K00830%09%23FFFFFF,green/K00276%09%23FFFFFF,green/K00108%09%23FFFFFF,purple/K00058%09%23FFFFFF,green/K00643%09%23FFFFFF,green/
ko00460	Cyanoamino acid metabolism	Metabolism	Metabolism of other amino acids	2	2	4	17	0.0130635	0.0773762	Hypma_015552,Hypma_015311	Hypma_006218,Hypma_005133	http://www.kegg.jp/kegg-bin/show_pathway?map00460/K01455%09%23FFFFFF,green/K00681%09%23FFFFFF,red/K05349%09%23FFFFFF,purple/
ko04146	Peroxisome	Cellular Processes	Transport and catabolism	0	8	8	59	0.0164925	0.0907087	-	Hypma_009009,Hypma_011560,Hypma_011831,Hypma_007237,Hypma_002922,Hypma_013561,Hypma_009173,Hypma_005309	http://www.kegg.jp/kegg-bin/show_pathway?map04146/K13239%09%23FFFFFF,green/K00624%09%23FFFFFF,green/K00830%09%23FFFFFF,green/K00272%09%23FFFFFF,green/K07513%09%23FFFFFF,green/K12663%09%23FFFFFF,green/K03781%09%23FFFFFF,green/
ko00360	Phenylalanine metabolism	Metabolism	Amino acid metabolism	1	3	4	20	0.0232957	0.118832	Hypma_003158	Hypma_002091,Hypma_013449,Hypma_010235	http://www.kegg.jp/kegg-bin/show_pathway?map00360/K00276%09%23FFFFFF,green/K00129%09%23FFFFFF,green/K10437%09%23FFFFFF,red/K00838%09%23FFFFFF,green/
ko00620	Pyruvate metabolism	Metabolism	Carbohydrate metabolism	1	5	6	41	0.0256818	0.118832	Hypma_008464	Hypma_012533,Hypma_006995,Hypma_002563,Hypma_002245,Hypma_003557	http://www.kegg.jp/kegg-bin/show_pathway?map00620/K00102%09%23FFFFFF,green/K00128%09%23FFFFFF,green/K01638%09%23FFFFFF,green/K01610%09%23FFFFFF,green/K00161%09%23FFFFFF,green/K00027%09%23FFFFFF,red/
ko00053	Ascorbate and aldarate metabolism	Metabolism	Carbohydrate metabolism	1	2	3	12	0.0265994	0.118832	Hypma_013322	Hypma_012533,Hypma_005058	http://www.kegg.jp/kegg-bin/show_pathway?map00053/K00128%09%23FFFFFF,green/K00469%09%23FFFFFF,green/K00103%09%23FFFFFF,red/
ko00250	Alanine, aspartate and glutamate metabolism	Metabolism	Amino acid metabolism	1	4	5	31	0.0277789	0.118832	Hypma_001474	Hypma_009009,Hypma_006158,Hypma_014717,Hypma_007237	http://www.kegg.jp/kegg-bin/show_pathway?map00250/K00262%09%23FFFFFF,green/K00830%09%23FFFFFF,green/K00272%09%23FFFFFF,green/K00814%09%23FFFFFF,red/K00823%09%23FFFFFF,green/
ko00340	Histidine metabolism	Metabolism	Amino acid metabolism	2	2	4	22	0.0322157	0.130558	Hypma_014038,Hypma_003293	Hypma_012533,Hypma_002091	http://www.kegg.jp/kegg-bin/show_pathway?map00340/K00129%09%23FFFFFF,green/K00128%09%23FFFFFF,green/K20247%09%23FFFFFF,red/K20246%09%23FFFFFF,red/
ko00030	Pentose phosphate pathway	Metabolism	Carbohydrate metabolism	2	2	4	24	0.0428809	0.165092	Hypma_001250,Hypma_014772	Hypma_011602,Hypma_000387	http://www.kegg.jp/kegg-bin/show_pathway?map00030/K00616%09%23FFFFFF,red/K01810%09%23FFFFFF,green/K03841%09%23FFFFFF,green/
ko00220	Arginine biosynthesis	Metabolism	Amino acid metabolism	2	1	3	16	0.0573907	0.210433	Hypma_001474,Hypma_015692	Hypma_014717	http://www.kegg.jp/kegg-bin/show_pathway?map00220/K00262%09%23FFFFFF,green/K00618%09%23FFFFFF,red/K00814%09%23FFFFFF,red/
ko00640	Propanoate metabolism	Metabolism	Carbohydrate metabolism	0	3	3	17	0.0668894	0.232533	-	Hypma_008015,Hypma_006158,Hypma_011263	http://www.kegg.jp/kegg-bin/show_pathway?map00640/K07511%09%23FFFFFF,green/K00823%09%23FFFFFF,green/K18369%09%23FFFFFF,green/
ko00051	Fructose and mannose metabolism	Metabolism	Carbohydrate metabolism	2	2	4	28	0.069458	0.232533	Hypma_002585,Hypma_008444	Hypma_011602,Hypma_011596	http://www.kegg.jp/kegg-bin/show_pathway?map00051/K03841%09%23FFFFFF,green/K19355%09%23FFFFFF,purple/
ko00040	Pentose and glucuronate interconversions	Metabolism	Carbohydrate metabolism	2	2	4	29	0.0771689	0.247584	Hypma_001427,Hypma_000517	Hypma_002222,Hypma_013340	http://www.kegg.jp/kegg-bin/show_pathway?map00040/K00002%09%23FFFFFF,red/K00065%09%23FFFFFF,green/K01213%09%23FFFFFF,purple/
ko00780	Biotin metabolism	Metabolism	Metabolism of cofactors and vitamins	0	2	2	9	0.0875934	0.260169	-	Hypma_016544,Hypma_011936	http://www.kegg.jp/kegg-bin/show_pathway?map00780/K00059%09%23FFFFFF,green/
ko00052	Galactose metabolism	Metabolism	Carbohydrate metabolism	2	1	3	19	0.0878492	0.260169	Hypma_004346,Hypma_005763	Hypma_014891	http://www.kegg.jp/kegg-bin/show_pathway?map00052/K01182%09%23FFFFFF,red/K00849%09%23FFFFFF,green/K07407%09%23FFFFFF,red/
ko00330	Arginine and proline metabolism	Metabolism	Amino acid metabolism	2	2	4	31	0.0938102	0.267533	Hypma_013261,Hypma_013259	Hypma_012533,Hypma_001054	http://www.kegg.jp/kegg-bin/show_pathway?map00330/K00819%09%23FFFFFF,green/K00128%09%23FFFFFF,green/K13366%09%23FFFFFF,red/
ko00500	Starch and sucrose metabolism	Metabolism	Carbohydrate metabolism	3	3	6	57	0.0992639	0.272976	Hypma_015311,Hypma_004313,Hypma_004346	Hypma_000387,Hypma_005133,Hypma_012216	http://www.kegg.jp/kegg-bin/show_pathway?map00500/K01176%09%23FFFFFF,red/K01810%09%23FFFFFF,green/K01182%09%23FFFFFF,red/K01225%09%23FFFFFF,green/K05349%09%23FFFFFF,purple/
ko00791	Atrazine degradation	Metabolism	Xenobiotics biodegradation and metabolism	0	1	1	2	0.109528	0.290816	-	Hypma_001082	http://www.kegg.jp/kegg-bin/show_pathway?map00791/K06035%09%23FFFFFF,green/
ko00513	Various types of N-glycan biosynthesis	Metabolism	Glycan biosynthesis and metabolism	2	1	3	23	0.136611	0.350635	Hypma_014077,Hypma_014078	Hypma_000044	http://www.kegg.jp/kegg-bin/show_pathway?map00513/K01230%09%23FFFFFF,purple/
ko00901	Indole alkaloid biosynthesis	Metabolism	Biosynthesis of other secondary metabolites	0	1	1	3	0.159726	0.394814	-	Hypma_003897	http://www.kegg.jp/kegg-bin/show_pathway?map00901/K19183%09%23FFFFFF,green/
ko00130	Ubiquinone and other terpenoid-quinone biosynthesis	Metabolism	Metabolism of cofactors and vitamins	0	2	2	13	0.164078	0.394814	-	Hypma_010235,Hypma_000340	http://www.kegg.jp/kegg-bin/show_pathway?map00130/K03809%09%23FFFFFF,green/K00838%09%23FFFFFF,green/
ko02010	ABC transporters	Environmental Information Processing	Membrane transport	0	2	2	14	0.184673	0.430905	-	Hypma_004976,Hypma_005009	http://www.kegg.jp/kegg-bin/show_pathway?map02010/K08712%09%23FFFFFF,green/
ko00592	alpha-Linolenic acid metabolism	Metabolism	Lipid metabolism	0	1	1	4	0.207106	0.469035	-	Hypma_002922	http://www.kegg.jp/kegg-bin/show_pathway?map00592/K07513%09%23FFFFFF,green/
ko00650	Butanoate metabolism	Metabolism	Carbohydrate metabolism	0	2	2	17	0.248103	0.526525	-	Hypma_008015,Hypma_006158	http://www.kegg.jp/kegg-bin/show_pathway?map00650/K07511%09%23FFFFFF,green/K00823%09%23FFFFFF,green/
ko00603	Glycosphingolipid biosynthesis - globo and isoglobo series	Metabolism	Glycan biosynthesis and metabolism	1	0	1	5	0.251826	0.526525	Hypma_005763	-	http://www.kegg.jp/kegg-bin/show_pathway?map00603/K07407%09%23FFFFFF,red/
ko00790	Folate biosynthesis	Metabolism	Metabolism of cofactors and vitamins	1	1	2	18	0.269484	0.526525	Hypma_011539	Hypma_012761	http://www.kegg.jp/kegg-bin/show_pathway?map00790/K01113%09%23FFFFFF,red/K01497%09%23FFFFFF,green/
ko00400	Phenylalanine, tyrosine and tryptophan biosynthesis	Metabolism	Amino acid metabolism	1	1	2	18	0.269484	0.526525	Hypma_016254	Hypma_010235	http://www.kegg.jp/kegg-bin/show_pathway?map00400/K00766%09%23FFFFFF,red/K00838%09%23FFFFFF,green/
ko00600	Sphingolipid metabolism	Metabolism	Lipid metabolism	2	0	2	18	0.269484	0.526525	Hypma_002213,Hypma_005763	-	http://www.kegg.jp/kegg-bin/show_pathway?map00600/K07407%09%23FFFFFF,red/K12350%09%23FFFFFF,red/
ko00061	Fatty acid biosynthesis	Metabolism	Lipid metabolism	0	2	2	19	0.290853	0.526525	-	Hypma_016544,Hypma_011936	http://www.kegg.jp/kegg-bin/show_pathway?map00061/K00059%09%23FFFFFF,green/
ko04933	AGE-RAGE signaling pathway in diabetic complications	Human Diseases	Endocrine and metabolic diseases	0	2	2	19	0.290853	0.526525	-	Hypma_015393,Hypma_005922	http://www.kegg.jp/kegg-bin/show_pathway?map04933/K04371%09%23FFFFFF,green/K07827%09%23FFFFFF,green/
ko00232	Caffeine metabolism	Metabolism	Biosynthesis of other secondary metabolites	1	0	1	6	0.294033	0.526525	Hypma_009915	-	http://www.kegg.jp/kegg-bin/show_pathway?map00232/K00365%09%23FFFFFF,red/
ko00430	Taurine and hypotaurine metabolism	Metabolism	Metabolism of other amino acids	1	0	1	6	0.294033	0.526525	Hypma_015552	-	http://www.kegg.jp/kegg-bin/show_pathway?map00430/K00681%09%23FFFFFF,red/
ko00280	Valine, leucine and isoleucine degradation	Metabolism	Amino acid metabolism	0	3	3	35	0.315363	0.539621	-	Hypma_012533,Hypma_008015,Hypma_002922	http://www.kegg.jp/kegg-bin/show_pathway?map00280/K07513%09%23FFFFFF,green/K00128%09%23FFFFFF,green/K07511%09%23FFFFFF,green/
ko00561	Glycerolipid metabolism	Metabolism	Lipid metabolism	2	1	3	35	0.315363	0.539621	Hypma_005763,Hypma_000517	Hypma_012533	http://www.kegg.jp/kegg-bin/show_pathway?map00561/K00002%09%23FFFFFF,red/K00128%09%23FFFFFF,green/K07407%09%23FFFFFF,red/
ko00062	Fatty acid elongation	Metabolism	Lipid metabolism	0	1	1	7	0.333869	0.558868	-	Hypma_008015	http://www.kegg.jp/kegg-bin/show_pathway?map00062/K07511%09%23FFFFFF,green/
ko00510	N-Glycan biosynthesis	Metabolism	Glycan biosynthesis and metabolism	2	1	3	37	0.346888	0.568307	Hypma_014077,Hypma_014078	Hypma_000044	http://www.kegg.jp/kegg-bin/show_pathway?map00510/K01230%09%23FFFFFF,purple/
ko00511	Other glycan degradation	Metabolism	Glycan biosynthesis and metabolism	1	0	1	8	0.371467	0.589267	Hypma_004042	-	http://www.kegg.jp/kegg-bin/show_pathway?map00511/K01192%09%23FFFFFF,red/
ko00900	Terpenoid backbone biosynthesis	Metabolism	Metabolism of terpenoids and polyketides	2	0	2	23	0.374988	0.589267	Hypma_002631,Hypma_004489	-	http://www.kegg.jp/kegg-bin/show_pathway?map00900/K00804%09%23FFFFFF,red/K00938%09%23FFFFFF,red/
ko00100	Steroid biosynthesis	Metabolism	Lipid metabolism	1	1	2	24	0.395442	0.60898	Hypma_006711	Hypma_005024	http://www.kegg.jp/kegg-bin/show_pathway?map00100/K00222%09%23FFFFFF,red/K05917%09%23FFFFFF,green/
ko00450	Selenocompound metabolism	Metabolism	Metabolism of other amino acids	0	1	1	9	0.406951	0.614416	-	Hypma_014315	http://www.kegg.jp/kegg-bin/show_pathway?map00450/K00384%09%23FFFFFF,green/
ko00514	Other types of O-glycan biosynthesis	Metabolism	Glycan biosynthesis and metabolism	0	1	1	10	0.44044	0.651582	-	Hypma_011614	http://www.kegg.jp/kegg-bin/show_pathway?map00514/K10967%09%23FFFFFF,green/
ko00270	Cysteine and methionine metabolism	Metabolism	Amino acid metabolism	1	2	3	44	0.455008	0.651582	Hypma_007653	Hypma_002605,Hypma_010235	http://www.kegg.jp/kegg-bin/show_pathway?map00270/K00838%09%23FFFFFF,green/K00547%09%23FFFFFF,green/K11204%09%23FFFFFF,red/
ko00740	Riboflavin metabolism	Metabolism	Metabolism of cofactors and vitamins	0	1	1	11	0.472046	0.651582	-	Hypma_012761	http://www.kegg.jp/kegg-bin/show_pathway?map00740/K01497%09%23FFFFFF,green/
ko00020	Citrate cycle (TCA cycle)	Metabolism	Carbohydrate metabolism	0	2	2	28	0.473878	0.651582	-	Hypma_002245,Hypma_003557	http://www.kegg.jp/kegg-bin/show_pathway?map00020/K01610%09%23FFFFFF,green/K00161%09%23FFFFFF,green/
ko04213	Longevity regulating pathway - multiple species	Organismal Systems	Aging	0	2	2	28	0.473878	0.651582	-	Hypma_005922,Hypma_005309	http://www.kegg.jp/kegg-bin/show_pathway?map04213/K03781%09%23FFFFFF,green/K07827%09%23FFFFFF,green/
ko00310	Lysine degradation	Metabolism	Amino acid metabolism	0	2	2	30	0.510747	0.689957	-	Hypma_012533,Hypma_008015	http://www.kegg.jp/kegg-bin/show_pathway?map00310/K00128%09%23FFFFFF,green/K07511%09%23FFFFFF,green/
ko00300	Lysine biosynthesis	Metabolism	Amino acid metabolism	0	1	1	15	0.581659	0.772202	-	Hypma_010235	http://www.kegg.jp/kegg-bin/show_pathway?map00300/K00838%09%23FFFFFF,green/
ko03410	Base excision repair	Genetic Information Processing	Replication and repair	0	2	2	38	0.640472	0.83587	-	Hypma_002573,Hypma_005066	http://www.kegg.jp/kegg-bin/show_pathway?map03410/K01247%09%23FFFFFF,green/K10773%09%23FFFFFF,green/
ko04130	SNARE interactions in vesicular transport	Genetic Information Processing	Folding, sorting and degradation	0	1	1	22	0.72176	0.911074	-	Hypma_011148	http://www.kegg.jp/kegg-bin/show_pathway?map04130/K08513%09%23FFFFFF,green/
ko00860	Porphyrin and chlorophyll metabolism	Metabolism	Metabolism of cofactors and vitamins	0	1	1	22	0.72176	0.911074	-	Hypma_009605	http://www.kegg.jp/kegg-bin/show_pathway?map00860/K00643%09%23FFFFFF,green/
ko04120	Ubiquitin mediated proteolysis	Genetic Information Processing	Folding, sorting and degradation	1	2	3	69	0.755889	0.938766	Hypma_006421	Hypma_013929,Hypma_001490	http://www.kegg.jp/kegg-bin/show_pathway?map04120/K10577%09%23FFFFFF,green/K10580%09%23FFFFFF,green/K03871%09%23FFFFFF,red/
ko00562	Inositol phosphate metabolism	Metabolism	Carbohydrate metabolism	0	1	1	29	0.815076	0.977983	-	Hypma_005058	http://www.kegg.jp/kegg-bin/show_pathway?map00562/K00469%09%23FFFFFF,green/
ko00230	Purine metabolism	Metabolism	Nucleotide metabolism	2	0	2	55	0.825511	0.977983	Hypma_013197,Hypma_009915	-	http://www.kegg.jp/kegg-bin/show_pathway?map00230/K00365%09%23FFFFFF,red/K01514%09%23FFFFFF,red/
ko03022	Basal transcription factors	Genetic Information Processing	Transcription	1	0	1	30	0.82557	0.977983	Hypma_006291	-	http://www.kegg.jp/kegg-bin/show_pathway?map03022/K03144%09%23FFFFFF,red/
ko00240	Pyrimidine metabolism	Metabolism	Nucleotide metabolism	0	1	1	32	0.844812	0.982741	-	Hypma_013800	http://www.kegg.jp/kegg-bin/show_pathway?map00240/K00757%09%23FFFFFF,green/
ko04011	MAPK signaling pathway - yeast	Environmental Information Processing	Signal transduction	1	3	4	108	0.867239	0.982741	Hypma_011637	Hypma_015393,Hypma_005309,Hypma_004330	http://www.kegg.jp/kegg-bin/show_pathway?map04011/K04371%09%23FFFFFF,green/K03781%09%23FFFFFF,green/K11228%09%23FFFFFF,red/K19833%09%23FFFFFF,green/
ko04141	Protein processing in endoplasmic reticulum	Genetic Information Processing	Folding, sorting and degradation	2	1	3	92	0.89946	0.982741	Hypma_014077,Hypma_014078	Hypma_000044	http://www.kegg.jp/kegg-bin/show_pathway?map04141/K01230%09%23FFFFFF,purple/
ko00564	Glycerophospholipid metabolism	Metabolism	Lipid metabolism	1	0	1	42	0.913573	0.982741	Hypma_009071	-	http://www.kegg.jp/kegg-bin/show_pathway?map00564/K01613%09%23FFFFFF,red/
ko03420	Nucleotide excision repair	Genetic Information Processing	Replication and repair	1	0	1	44	0.923135	0.982741	Hypma_006291	-	http://www.kegg.jp/kegg-bin/show_pathway?map03420/K03144%09%23FFFFFF,red/
ko04138	Autophagy - yeast	Cellular Processes	Transport and catabolism	0	2	2	75	0.931027	0.982741	-	Hypma_005922,Hypma_015544	http://www.kegg.jp/kegg-bin/show_pathway?map04138/K01336%09%23FFFFFF,green/K07827%09%23FFFFFF,green/
ko03008	Ribosome biogenesis in eukaryotes	Genetic Information Processing	Translation	1	1	2	75	0.931027	0.982741	Hypma_010511	Hypma_013514	http://www.kegg.jp/kegg-bin/show_pathway?map03008/K14758%09%23FFFFFF,purple/
ko04144	Endocytosis	Cellular Processes	Transport and catabolism	0	2	2	82	0.950848	0.982741	-	Hypma_015819,Hypma_005393	http://www.kegg.jp/kegg-bin/show_pathway?map04144/K05747%09%23FFFFFF,green/K12188%09%23FFFFFF,green/
ko00190	Oxidative phosphorylation	Metabolism	Energy metabolism	1	1	2	82	0.950848	0.982741	Hypma_015777	Hypma_014459	http://www.kegg.jp/kegg-bin/show_pathway?map00190/K02272%09%23FFFFFF,green/K00356%09%23FFFFFF,red/
ko03018	RNA degradation	Genetic Information Processing	Folding, sorting and degradation	1	0	1	57	0.96418	0.982741	Hypma_007319	-	http://www.kegg.jp/kegg-bin/show_pathway?map03018/K13126%09%23FFFFFF,red/
ko03015	mRNA surveillance pathway	Genetic Information Processing	Translation	1	0	1	60	0.969978	0.982741	Hypma_007319	-	http://www.kegg.jp/kegg-bin/show_pathway?map03015/K13126%09%23FFFFFF,red/
ko03013	RNA transport	Genetic Information Processing	Translation	1	2	3	140	0.987946	0.987946	Hypma_007319	Hypma_001490,Hypma_009768	http://www.kegg.jp/kegg-bin/show_pathway?map03013/K10577%09%23FFFFFF,green/K03257%09%23FFFFFF,green/K13126%09%23FFFFFF,red/

## Sheet: 50 vs 110
PathwayID	Pathway	Level1	Level2	Up_number	Down_number	DEG_number	total_number	Pvalue	FDR	Up_gene	Down_gene	URL
ko00410	beta-Alanine metabolism	Metabolism	Metabolism of other amino acids	3	4	7	23	8.68239e-05	0.00659861	Hypma_013260,Hypma_013261,Hypma_013259	Hypma_012533,Hypma_002091,Hypma_006158,Hypma_013449	http://www.kegg.jp/kegg-bin/show_pathway?map00410/K00276%09%23FFFFFF,green/K00129%09%23FFFFFF,green/K00128%09%23FFFFFF,green/K13366%09%23FFFFFF,red/K00823%09%23FFFFFF,green/
ko01040	Biosynthesis of unsaturated fatty acids	Metabolism	Lipid metabolism	1	5	6	25	0.00115236	0.0377598	Hypma_003909	Hypma_005051,Hypma_003453,Hypma_002922,Hypma_014463,Hypma_001218	http://www.kegg.jp/kegg-bin/show_pathway?map01040/K00232%09%23FFFFFF,green/K07513%09%23FFFFFF,green/K10256%09%23FFFFFF,purple/
ko00350	Tyrosine metabolism	Metabolism	Amino acid metabolism	2	3	5	18	0.00149052	0.0377598	Hypma_012178,Hypma_009729	Hypma_002091,Hypma_013449,Hypma_010235	http://www.kegg.jp/kegg-bin/show_pathway?map00350/K13953%09%23FFFFFF,red/K00276%09%23FFFFFF,green/K00129%09%23FFFFFF,green/K00505%09%23FFFFFF,red/K00838%09%23FFFFFF,green/
ko00360	Phenylalanine metabolism	Metabolism	Amino acid metabolism	1	4	5	20	0.00248524	0.0472195	Hypma_003158	Hypma_002091,Hypma_013202,Hypma_013449,Hypma_010235	http://www.kegg.jp/kegg-bin/show_pathway?map00360/K00276%09%23FFFFFF,green/K00129%09%23FFFFFF,green/K01426%09%23FFFFFF,green/K10437%09%23FFFFFF,red/K00838%09%23FFFFFF,green/
ko00330	Arginine and proline metabolism	Metabolism	Amino acid metabolism	3	3	6	31	0.00372814	0.0549883	Hypma_013260,Hypma_013261,Hypma_013259	Hypma_012533,Hypma_013202,Hypma_001054	http://www.kegg.jp/kegg-bin/show_pathway?map00330/K00819%09%23FFFFFF,green/K01426%09%23FFFFFF,green/K00128%09%23FFFFFF,green/K13366%09%23FFFFFF,red/
ko00010	Glycolysis / Gluconeogenesis	Metabolism	Carbohydrate metabolism	3	4	7	44	0.00555151	0.0549883	Hypma_009729,Hypma_000898,Hypma_000517	Hypma_012533,Hypma_002091,Hypma_011602,Hypma_015512	http://www.kegg.jp/kegg-bin/show_pathway?map00010/K13953%09%23FFFFFF,red/K00002%09%23FFFFFF,red/K00129%09%23FFFFFF,green/K01568%09%23FFFFFF,red/K00128%09%23FFFFFF,green/K03841%09%23FFFFFF,green/K01792%09%23FFFFFF,green/
ko00680	Methane metabolism	Metabolism	Energy metabolism	0	5	5	24	0.00578824	0.0549883	-	Hypma_015590,Hypma_011602,Hypma_011943,Hypma_007750,Hypma_010797	http://www.kegg.jp/kegg-bin/show_pathway?map00680/K17066%09%23FFFFFF,green/K00058%09%23FFFFFF,green/K03841%09%23FFFFFF,green/K00122%09%23FFFFFF,green/
ko00071	Fatty acid degradation	Metabolism	Lipid metabolism	1	4	5	24	0.00578824	0.0549883	Hypma_009729	Hypma_012533,Hypma_011560,Hypma_002922,Hypma_001218	http://www.kegg.jp/kegg-bin/show_pathway?map00071/K13239%09%23FFFFFF,green/K13953%09%23FFFFFF,red/K00232%09%23FFFFFF,green/K07513%09%23FFFFFF,green/K00128%09%23FFFFFF,green/
ko00040	Pentose and glucuronate interconversions	Metabolism	Carbohydrate metabolism	3	2	5	29	0.0132059	0.106013	Hypma_001427,Hypma_007393,Hypma_000517	Hypma_002222,Hypma_007173	http://www.kegg.jp/kegg-bin/show_pathway?map00040/K17818%09%23FFFFFF,green/K18107%09%23FFFFFF,red/K00002%09%23FFFFFF,red/K00065%09%23FFFFFF,green/K01213%09%23FFFFFF,red/
ko00592	alpha-Linolenic acid metabolism	Metabolism	Lipid metabolism	0	2	2	4	0.0139491	0.106013	-	Hypma_002922,Hypma_001218	http://www.kegg.jp/kegg-bin/show_pathway?map00592/K00232%09%23FFFFFF,green/K07513%09%23FFFFFF,green/
ko00630	Glyoxylate and dicarboxylate metabolism	Metabolism	Carbohydrate metabolism	0	4	4	26	0.0381627	0.263669	-	Hypma_000863,Hypma_002563,Hypma_007750,Hypma_005309	http://www.kegg.jp/kegg-bin/show_pathway?map00630/K01637%09%23FFFFFF,green/K01638%09%23FFFFFF,green/K03781%09%23FFFFFF,green/K00122%09%23FFFFFF,green/
ko00220	Arginine biosynthesis	Metabolism	Amino acid metabolism	3	0	3	16	0.0425542	0.26951	Hypma_015692,Hypma_001474,Hypma_002214	-	http://www.kegg.jp/kegg-bin/show_pathway?map00220/K00620%09%23FFFFFF,red/K00618%09%23FFFFFF,red/K00814%09%23FFFFFF,red/
ko00051	Fructose and mannose metabolism	Metabolism	Carbohydrate metabolism	2	2	4	28	0.0483947	0.282923	Hypma_002585,Hypma_008444	Hypma_011602,Hypma_011596	http://www.kegg.jp/kegg-bin/show_pathway?map00051/K03841%09%23FFFFFF,green/K19355%09%23FFFFFF,purple/
ko00480	Glutathione metabolism	Metabolism	Metabolism of other amino acids	1	3	4	29	0.0540249	0.293278	Hypma_015552	Hypma_010183,Hypma_014954,Hypma_000264	http://www.kegg.jp/kegg-bin/show_pathway?map00480/K00036%09%23FFFFFF,green/K00799%09%23FFFFFF,green/K00681%09%23FFFFFF,red/
ko00260	Glycine, serine and threonine metabolism	Metabolism	Amino acid metabolism	0	5	5	44	0.0663172	0.299738	-	Hypma_015590,Hypma_004182,Hypma_009605,Hypma_006682,Hypma_013449	http://www.kegg.jp/kegg-bin/show_pathway?map00260/K00108%09%23FFFFFF,green/K00276%09%23FFFFFF,green/K00058%09%23FFFFFF,green/K00643%09%23FFFFFF,green/
ko00780	Biotin metabolism	Metabolism	Metabolism of cofactors and vitamins	0	2	2	9	0.0709646	0.299738	-	Hypma_016544,Hypma_011936	http://www.kegg.jp/kegg-bin/show_pathway?map00780/K00059%09%23FFFFFF,green/
ko04146	Peroxisome	Cellular Processes	Transport and catabolism	0	6	6	59	0.0722363	0.299738	-	Hypma_011560,Hypma_011831,Hypma_002922,Hypma_009173,Hypma_005309,Hypma_001218	http://www.kegg.jp/kegg-bin/show_pathway?map04146/K13239%09%23FFFFFF,green/K00624%09%23FFFFFF,green/K00232%09%23FFFFFF,green/K07513%09%23FFFFFF,green/K12663%09%23FFFFFF,green/K03781%09%23FFFFFF,green/
ko00380	Tryptophan metabolism	Metabolism	Amino acid metabolism	0	4	4	32	0.0729375	0.299738	-	Hypma_012533,Hypma_013202,Hypma_005309,Hypma_010235	http://www.kegg.jp/kegg-bin/show_pathway?map00380/K01426%09%23FFFFFF,green/K00128%09%23FFFFFF,green/K00838%09%23FFFFFF,green/K03781%09%23FFFFFF,green/
ko00910	Nitrogen metabolism	Metabolism	Energy metabolism	0	3	3	20	0.0749346	0.299738	-	Hypma_008236,Hypma_005776,Hypma_014174	http://www.kegg.jp/kegg-bin/show_pathway?map00910/K00459%09%23FFFFFF,green/K10534%09%23FFFFFF,green/K01673%09%23FFFFFF,green/
ko00340	Histidine metabolism	Metabolism	Amino acid metabolism	1	2	3	22	0.0942067	0.352731	Hypma_014038	Hypma_012533,Hypma_002091	http://www.kegg.jp/kegg-bin/show_pathway?map00340/K00129%09%23FFFFFF,green/K00128%09%23FFFFFF,green/K20246%09%23FFFFFF,red/
ko00791	Atrazine degradation	Metabolism	Xenobiotics biodegradation and metabolism	0	1	1	2	0.0974651	0.352731	-	Hypma_001082	http://www.kegg.jp/kegg-bin/show_pathway?map00791/K06035%09%23FFFFFF,green/
ko00030	Pentose phosphate pathway	Metabolism	Carbohydrate metabolism	1	2	3	24	0.115277	0.39006	Hypma_014772	Hypma_010183,Hypma_011602	http://www.kegg.jp/kegg-bin/show_pathway?map00030/K00616%09%23FFFFFF,red/K00036%09%23FFFFFF,green/K03841%09%23FFFFFF,green/
ko00053	Ascorbate and aldarate metabolism	Metabolism	Carbohydrate metabolism	1	1	2	12	0.118044	0.39006	Hypma_013322	Hypma_012533	http://www.kegg.jp/kegg-bin/show_pathway?map00053/K00128%09%23FFFFFF,green/K00103%09%23FFFFFF,red/
ko00130	Ubiquinone and other terpenoid-quinone biosynthesis	Metabolism	Metabolism of cofactors and vitamins	0	2	2	13	0.135097	0.427807	-	Hypma_000340,Hypma_010235	http://www.kegg.jp/kegg-bin/show_pathway?map00130/K03809%09%23FFFFFF,green/K00838%09%23FFFFFF,green/
ko00620	Pyruvate metabolism	Metabolism	Carbohydrate metabolism	1	3	4	41	0.146281	0.444695	Hypma_008464	Hypma_012533,Hypma_002563,Hypma_006995	http://www.kegg.jp/kegg-bin/show_pathway?map00620/K00102%09%23FFFFFF,green/K00128%09%23FFFFFF,green/K01638%09%23FFFFFF,green/K00027%09%23FFFFFF,red/
ko00640	Propanoate metabolism	Metabolism	Carbohydrate metabolism	0	2	2	17	0.207462	0.559311	-	Hypma_011263,Hypma_006158	http://www.kegg.jp/kegg-bin/show_pathway?map00640/K18369%09%23FFFFFF,green/K00823%09%23FFFFFF,green/
ko00460	Cyanoamino acid metabolism	Metabolism	Metabolism of other amino acids	2	0	2	17	0.207462	0.559311	Hypma_015552,Hypma_015311	-	http://www.kegg.jp/kegg-bin/show_pathway?map00460/K00681%09%23FFFFFF,red/K05349%09%23FFFFFF,red/
ko00650	Butanoate metabolism	Metabolism	Carbohydrate metabolism	0	2	2	17	0.207462	0.559311	-	Hypma_006158,Hypma_008671	http://www.kegg.jp/kegg-bin/show_pathway?map00650/K00823%09%23FFFFFF,green/K01027%09%23FFFFFF,green/
ko00400	Phenylalanine, tyrosine and tryptophan biosynthesis	Metabolism	Amino acid metabolism	1	1	2	18	0.226187	0.559311	Hypma_016254	Hypma_010235	http://www.kegg.jp/kegg-bin/show_pathway?map00400/K00766%09%23FFFFFF,red/K00838%09%23FFFFFF,green/
ko00520	Amino sugar and nucleotide sugar metabolism	Metabolism	Carbohydrate metabolism	3	2	5	66	0.232608	0.559311	Hypma_007440,Hypma_003279,Hypma_001039	Hypma_013835,Hypma_014891	http://www.kegg.jp/kegg-bin/show_pathway?map00520/K00698%09%23FFFFFF,green/K00849%09%23FFFFFF,green/K01209%09%23FFFFFF,red/K01183%09%23FFFFFF,red/
ko00061	Fatty acid biosynthesis	Metabolism	Lipid metabolism	0	2	2	19	0.245029	0.559311	-	Hypma_016544,Hypma_011936	http://www.kegg.jp/kegg-bin/show_pathway?map00061/K00059%09%23FFFFFF,green/
ko04933	AGE-RAGE signaling pathway in diabetic complications	Human Diseases	Endocrine and metabolic diseases	1	1	2	19	0.245029	0.559311	Hypma_011919	Hypma_015393	http://www.kegg.jp/kegg-bin/show_pathway?map04933/K04371%09%23FFFFFF,green/K07827%09%23FFFFFF,red/
ko00280	Valine, leucine and isoleucine degradation	Metabolism	Amino acid metabolism	0	3	3	35	0.253648	0.559311	-	Hypma_012533,Hypma_002922,Hypma_008671	http://www.kegg.jp/kegg-bin/show_pathway?map00280/K07513%09%23FFFFFF,green/K00128%09%23FFFFFF,green/K01027%09%23FFFFFF,green/
ko00561	Glycerolipid metabolism	Metabolism	Lipid metabolism	1	2	3	35	0.253648	0.559311	Hypma_000517	Hypma_012533,Hypma_007939	http://www.kegg.jp/kegg-bin/show_pathway?map00561/K00002%09%23FFFFFF,red/K18097%09%23FFFFFF,green/K00128%09%23FFFFFF,green/
ko00430	Taurine and hypotaurine metabolism	Metabolism	Metabolism of other amino acids	1	0	1	6	0.264937	0.559311	Hypma_015552	-	http://www.kegg.jp/kegg-bin/show_pathway?map00430/K00681%09%23FFFFFF,red/
ko00072	Synthesis and degradation of ketone bodies	Metabolism	Lipid metabolism	0	1	1	6	0.264937	0.559311	-	Hypma_008671	http://www.kegg.jp/kegg-bin/show_pathway?map00072/K01027%09%23FFFFFF,green/
ko00510	N-Glycan biosynthesis	Metabolism	Glycan biosynthesis and metabolism	2	1	3	37	0.281186	0.565666	Hypma_014077,Hypma_014078	Hypma_007931	http://www.kegg.jp/kegg-bin/show_pathway?map00510/K01230%09%23FFFFFF,red/K00737%09%23FFFFFF,green/
ko00920	Sulfur metabolism	Metabolism	Energy metabolism	0	2	2	21	0.282833	0.565666	-	Hypma_003156,Hypma_009007	http://www.kegg.jp/kegg-bin/show_pathway?map00920/K17069%09%23FFFFFF,green/K00381%09%23FFFFFF,green/
ko00513	Various types of N-glycan biosynthesis	Metabolism	Glycan biosynthesis and metabolism	2	0	2	23	0.320473	0.624512	Hypma_014077,Hypma_014078	-	http://www.kegg.jp/kegg-bin/show_pathway?map00513/K01230%09%23FFFFFF,red/
ko00511	Other glycan degradation	Metabolism	Glycan biosynthesis and metabolism	1	0	1	8	0.336682	0.628626	Hypma_004042	-	http://www.kegg.jp/kegg-bin/show_pathway?map00511/K01192%09%23FFFFFF,red/
ko00100	Steroid biosynthesis	Metabolism	Lipid metabolism	1	1	2	24	0.339127	0.628626	Hypma_006711	Hypma_005024	http://www.kegg.jp/kegg-bin/show_pathway?map00100/K00222%09%23FFFFFF,red/K05917%09%23FFFFFF,green/
ko00270	Cysteine and methionine metabolism	Metabolism	Amino acid metabolism	0	3	3	44	0.378549	0.684993	-	Hypma_003156,Hypma_002605,Hypma_010235	http://www.kegg.jp/kegg-bin/show_pathway?map00270/K00838%09%23FFFFFF,green/K17069%09%23FFFFFF,green/K00547%09%23FFFFFF,green/
ko00514	Other types of O-glycan biosynthesis	Metabolism	Glycan biosynthesis and metabolism	0	1	1	10	0.401456	0.693425	-	Hypma_011614	http://www.kegg.jp/kegg-bin/show_pathway?map00514/K10967%09%23FFFFFF,green/
ko04392	Hippo signaling pathway - multiple species	Environmental Information Processing	Signal transduction	1	0	1	10	0.401456	0.693425	Hypma_006772	-	http://www.kegg.jp/kegg-bin/show_pathway?map04392/K09448%09%23FFFFFF,red/
ko04213	Longevity regulating pathway - multiple species	Organismal Systems	Aging	1	1	2	28	0.411875	0.695611	Hypma_011919	Hypma_005309	http://www.kegg.jp/kegg-bin/show_pathway?map04213/K03781%09%23FFFFFF,green/K07827%09%23FFFFFF,red/
ko00730	Thiamine metabolism	Metabolism	Metabolism of cofactors and vitamins	1	0	1	11	0.431442	0.712818	Hypma_000755	-	http://www.kegg.jp/kegg-bin/show_pathway?map00730/K03146%09%23FFFFFF,red/
ko04011	MAPK signaling pathway - yeast	Environmental Information Processing	Signal transduction	1	5	6	108	0.455981	0.734335	Hypma_006772	Hypma_005529,Hypma_015393,Hypma_014595,Hypma_005309,Hypma_004330	http://www.kegg.jp/kegg-bin/show_pathway?map04011/K19842%09%23FFFFFF,green/K04371%09%23FFFFFF,green/K09448%09%23FFFFFF,red/K03781%09%23FFFFFF,green/K09265%09%23FFFFFF,green/K19833%09%23FFFFFF,green/
ko00250	Alanine, aspartate and glutamate metabolism	Metabolism	Amino acid metabolism	1	1	2	31	0.463791	0.734335	Hypma_001474	Hypma_006158	http://www.kegg.jp/kegg-bin/show_pathway?map00250/K00814%09%23FFFFFF,red/K00823%09%23FFFFFF,green/
ko00670	One carbon pool by folate	Metabolism	Metabolism of cofactors and vitamins	1	0	1	13	0.487003	0.755351	Hypma_009136	-	http://www.kegg.jp/kegg-bin/show_pathway?map00670/K00297%09%23FFFFFF,red/
ko00290	Valine, leucine and isoleucine biosynthesis	Metabolism	Amino acid metabolism	0	1	1	14	0.512722	0.764056	-	Hypma_009550	http://www.kegg.jp/kegg-bin/show_pathway?map00290/K01702%09%23FFFFFF,green/
ko02010	ABC transporters	Environmental Information Processing	Membrane transport	0	1	1	14	0.512722	0.764056	-	Hypma_004975	http://www.kegg.jp/kegg-bin/show_pathway?map02010/K08712%09%23FFFFFF,green/
ko00300	Lysine biosynthesis	Metabolism	Amino acid metabolism	0	1	1	15	0.537158	0.785077	-	Hypma_010235	http://www.kegg.jp/kegg-bin/show_pathway?map00300/K00838%09%23FFFFFF,green/
ko03410	Base excision repair	Genetic Information Processing	Replication and repair	0	2	2	38	0.573701	0.822665	-	Hypma_002573,Hypma_005066	http://www.kegg.jp/kegg-bin/show_pathway?map03410/K01247%09%23FFFFFF,green/K10773%09%23FFFFFF,green/
ko00790	Folate biosynthesis	Metabolism	Metabolism of cofactors and vitamins	1	0	1	18	0.603386	0.83377	Hypma_011539	-	http://www.kegg.jp/kegg-bin/show_pathway?map00790/K01113%09%23FFFFFF,red/
ko00600	Sphingolipid metabolism	Metabolism	Lipid metabolism	1	0	1	18	0.603386	0.83377	Hypma_002213	-	http://www.kegg.jp/kegg-bin/show_pathway?map00600/K12350%09%23FFFFFF,red/
ko00052	Galactose metabolism	Metabolism	Carbohydrate metabolism	0	1	1	19	0.623295	0.8459	-	Hypma_014891	http://www.kegg.jp/kegg-bin/show_pathway?map00052/K00849%09%23FFFFFF,green/
ko00860	Porphyrin and chlorophyll metabolism	Metabolism	Metabolism of cofactors and vitamins	0	1	1	22	0.677249	0.87839	-	Hypma_009605	http://www.kegg.jp/kegg-bin/show_pathway?map00860/K00643%09%23FFFFFF,green/
ko00770	Pantothenate and CoA biosynthesis	Metabolism	Metabolism of cofactors and vitamins	1	0	1	22	0.677249	0.87839	Hypma_010266	-	http://www.kegg.jp/kegg-bin/show_pathway?map00770/K00997%09%23FFFFFF,red/
ko04141	Protein processing in endoplasmic reticulum	Genetic Information Processing	Folding, sorting and degradation	2	2	4	92	0.683553	0.87839	Hypma_014077,Hypma_014078	Hypma_010135,Hypma_010214	http://www.kegg.jp/kegg-bin/show_pathway?map04141/K09487%09%23FFFFFF,green/K09580%09%23FFFFFF,green/K01230%09%23FFFFFF,red/
ko00900	Terpenoid backbone biosynthesis	Metabolism	Metabolism of terpenoids and polyketides	1	0	1	23	0.693466	0.87839	Hypma_002631	-	http://www.kegg.jp/kegg-bin/show_pathway?map00900/K00938%09%23FFFFFF,red/
ko00190	Oxidative phosphorylation	Metabolism	Energy metabolism	1	2	3	82	0.786289	0.919253	Hypma_015777	Hypma_008612,Hypma_014459	http://www.kegg.jp/kegg-bin/show_pathway?map00190/K02272%09%23FFFFFF,green/K00356%09%23FFFFFF,red/K02260%09%23FFFFFF,green/
ko00310	Lysine degradation	Metabolism	Amino acid metabolism	0	1	1	30	0.786402	0.919253	-	Hypma_012533	http://www.kegg.jp/kegg-bin/show_pathway?map00310/K00128%09%23FFFFFF,green/
ko03022	Basal transcription factors	Genetic Information Processing	Transcription	1	0	1	30	0.786402	0.919253	Hypma_006291	-	http://www.kegg.jp/kegg-bin/show_pathway?map03022/K03144%09%23FFFFFF,red/
ko00500	Starch and sucrose metabolism	Metabolism	Carbohydrate metabolism	2	0	2	57	0.786939	0.919253	Hypma_015311,Hypma_004313	-	http://www.kegg.jp/kegg-bin/show_pathway?map00500/K01176%09%23FFFFFF,red/K05349%09%23FFFFFF,red/
ko03018	RNA degradation	Genetic Information Processing	Folding, sorting and degradation	2	0	2	57	0.786939	0.919253	Hypma_007319,Hypma_008451	-	http://www.kegg.jp/kegg-bin/show_pathway?map03018/K03514%09%23FFFFFF,red/K13126%09%23FFFFFF,red/
ko00240	Pyrimidine metabolism	Metabolism	Nucleotide metabolism	0	1	1	32	0.80737	0.919253	-	Hypma_013800	http://www.kegg.jp/kegg-bin/show_pathway?map00240/K00757%09%23FFFFFF,green/
ko03015	mRNA surveillance pathway	Genetic Information Processing	Translation	2	0	2	60	0.810394	0.919253	Hypma_006688,Hypma_007319	-	http://www.kegg.jp/kegg-bin/show_pathway?map03015/K14326%09%23FFFFFF,red/K13126%09%23FFFFFF,red/
ko04120	Ubiquitin mediated proteolysis	Genetic Information Processing	Folding, sorting and degradation	0	2	2	69	0.867564	0.959619	-	Hypma_013929,Hypma_001490	http://www.kegg.jp/kegg-bin/show_pathway?map04120/K10577%09%23FFFFFF,green/K10580%09%23FFFFFF,green/
ko00564	Glycerophospholipid metabolism	Metabolism	Lipid metabolism	1	0	1	42	0.885182	0.959619	Hypma_012845	-	http://www.kegg.jp/kegg-bin/show_pathway?map00564/K06128%09%23FFFFFF,red/
ko03008	Ribosome biogenesis in eukaryotes	Genetic Information Processing	Translation	1	1	2	75	0.896422	0.959619	Hypma_008646	Hypma_013514	http://www.kegg.jp/kegg-bin/show_pathway?map03008/K14527%09%23FFFFFF,red/K14758%09%23FFFFFF,green/
ko03420	Nucleotide excision repair	Genetic Information Processing	Replication and repair	1	0	1	44	0.896486	0.959619	Hypma_006291	-	http://www.kegg.jp/kegg-bin/show_pathway?map03420/K03144%09%23FFFFFF,red/
ko04144	Endocytosis	Cellular Processes	Transport and catabolism	0	2	2	82	0.922687	0.964867	-	Hypma_015819,Hypma_005393	http://www.kegg.jp/kegg-bin/show_pathway?map04144/K05747%09%23FFFFFF,green/K12188%09%23FFFFFF,green/
ko03013	RNA transport	Genetic Information Processing	Translation	3	1	4	140	0.92678	0.964867	Hypma_006688,Hypma_007319,Hypma_008646	Hypma_001490	http://www.kegg.jp/kegg-bin/show_pathway?map03013/K10577%09%23FFFFFF,green/K14527%09%23FFFFFF,red/K14326%09%23FFFFFF,red/K13126%09%23FFFFFF,red/
ko00230	Purine metabolism	Metabolism	Nucleotide metabolism	1	0	1	55	0.941517	0.966964	Hypma_013197	-	http://www.kegg.jp/kegg-bin/show_pathway?map00230/K01514%09%23FFFFFF,red/
ko04138	Autophagy - yeast	Cellular Processes	Transport and catabolism	1	0	1	75	0.979376	0.992434	Hypma_011919	-	http://www.kegg.jp/kegg-bin/show_pathway?map04138/K07827%09%23FFFFFF,red/
ko03010	Ribosome	Genetic Information Processing	Translation	0	1	1	107	0.996151	0.996151	-	Hypma_007262	http://www.kegg.jp/kegg-bin/show_pathway?map03010/K02974%09%23FFFFFF,green/

## Sheet: 70 vs110
PathwayID	Pathway	Level1	Level2	Up_number	Down_number	DEG_number	total_number	Pvalue	FDR	Up_gene	Down_gene	URL
ko01040	Biosynthesis of unsaturated fatty acids	Metabolism	Lipid metabolism	0	5	5	25	0.000836793	0.0493708	-	Hypma_005051,Hypma_014461,Hypma_003453,Hypma_002922,Hypma_014463	http://www.kegg.jp/kegg-bin/show_pathway?map01040/K10256%09%23FFFFFF,green/K07513%09%23FFFFFF,green/
ko00350	Tyrosine metabolism	Metabolism	Amino acid metabolism	1	3	4	18	0.00189237	0.0558249	Hypma_012178	Hypma_002091,Hypma_010742,Hypma_010235	http://www.kegg.jp/kegg-bin/show_pathway?map00350/K00129%09%23FFFFFF,green/K01557%09%23FFFFFF,green/K00505%09%23FFFFFF,red/K00838%09%23FFFFFF,green/
ko00380	Tryptophan metabolism	Metabolism	Amino acid metabolism	0	4	4	32	0.0159412	0.267125	-	Hypma_012533,Hypma_014940,Hypma_005309,Hypma_010235	http://www.kegg.jp/kegg-bin/show_pathway?map00380/K00128%09%23FFFFFF,green/K00463%09%23FFFFFF,green/K00838%09%23FFFFFF,green/K03781%09%23FFFFFF,green/
ko00360	Phenylalanine metabolism	Metabolism	Amino acid metabolism	0	3	3	20	0.0223009	0.267125	-	Hypma_003159,Hypma_002091,Hypma_010235	http://www.kegg.jp/kegg-bin/show_pathway?map00360/K10437%09%23FFFFFF,green/K00129%09%23FFFFFF,green/K00838%09%23FFFFFF,green/
ko00340	Histidine metabolism	Metabolism	Amino acid metabolism	1	2	3	22	0.0288118	0.267125	Hypma_014038	Hypma_012533,Hypma_002091	http://www.kegg.jp/kegg-bin/show_pathway?map00340/K00129%09%23FFFFFF,green/K00128%09%23FFFFFF,green/K20246%09%23FFFFFF,red/
ko00780	Biotin metabolism	Metabolism	Metabolism of cofactors and vitamins	0	2	2	9	0.0295238	0.267125	-	Hypma_016544,Hypma_011936	http://www.kegg.jp/kegg-bin/show_pathway?map00780/K00059%09%23FFFFFF,green/
ko00410	beta-Alanine metabolism	Metabolism	Metabolism of other amino acids	0	3	3	23	0.0324046	0.267125	-	Hypma_012533,Hypma_002091,Hypma_006158	http://www.kegg.jp/kegg-bin/show_pathway?map00410/K00129%09%23FFFFFF,green/K00128%09%23FFFFFF,green/K00823%09%23FFFFFF,green/
ko00680	Methane metabolism	Metabolism	Energy metabolism	0	3	3	24	0.0362204	0.267125	-	Hypma_011943,Hypma_007750,Hypma_010797	http://www.kegg.jp/kegg-bin/show_pathway?map00680/K17066%09%23FFFFFF,green/K00122%09%23FFFFFF,green/
ko00053	Ascorbate and aldarate metabolism	Metabolism	Carbohydrate metabolism	1	1	2	12	0.0509649	0.334103	Hypma_013322	Hypma_012533	http://www.kegg.jp/kegg-bin/show_pathway?map00053/K00128%09%23FFFFFF,green/K00103%09%23FFFFFF,red/
ko00040	Pentose and glucuronate interconversions	Metabolism	Carbohydrate metabolism	1	2	3	29	0.0585482	0.345435	Hypma_001427	Hypma_013340,Hypma_007173	http://www.kegg.jp/kegg-bin/show_pathway?map00040/K17818%09%23FFFFFF,green/K01213%09%23FFFFFF,purple/
ko00220	Arginine biosynthesis	Metabolism	Amino acid metabolism	2	0	2	16	0.0855794	0.434683	Hypma_015692,Hypma_001474	-	http://www.kegg.jp/kegg-bin/show_pathway?map00220/K00618%09%23FFFFFF,red/K00814%09%23FFFFFF,red/
ko00460	Cyanoamino acid metabolism	Metabolism	Metabolism of other amino acids	1	1	2	17	0.0950931	0.434683	Hypma_015552	Hypma_005133	http://www.kegg.jp/kegg-bin/show_pathway?map00460/K00681%09%23FFFFFF,red/K05349%09%23FFFFFF,green/
ko04146	Peroxisome	Cellular Processes	Transport and catabolism	0	4	4	59	0.107659	0.434683	-	Hypma_011831,Hypma_002922,Hypma_009173,Hypma_005309	http://www.kegg.jp/kegg-bin/show_pathway?map04146/K00624%09%23FFFFFF,green/K07513%09%23FFFFFF,green/K12663%09%23FFFFFF,green/K03781%09%23FFFFFF,green/
ko00061	Fatty acid biosynthesis	Metabolism	Lipid metabolism	0	2	2	19	0.114953	0.434683	-	Hypma_016544,Hypma_011936	http://www.kegg.jp/kegg-bin/show_pathway?map00061/K00059%09%23FFFFFF,green/
ko04011	MAPK signaling pathway - yeast	Environmental Information Processing	Signal transduction	0	6	6	108	0.115204	0.434683	-	Hypma_015393,Hypma_014595,Hypma_005760,Hypma_001678,Hypma_005309,Hypma_004330	http://www.kegg.jp/kegg-bin/show_pathway?map04011/K04371%09%23FFFFFF,green/K04627%09%23FFFFFF,green/K06666%09%23FFFFFF,green/K03781%09%23FFFFFF,green/K09265%09%23FFFFFF,green/K19833%09%23FFFFFF,green/
ko00592	alpha-Linolenic acid metabolism	Metabolism	Lipid metabolism	0	1	1	4	0.11791	0.434683	-	Hypma_002922	http://www.kegg.jp/kegg-bin/show_pathway?map00592/K07513%09%23FFFFFF,green/
ko00910	Nitrogen metabolism	Metabolism	Energy metabolism	0	2	2	20	0.125248	0.434683	-	Hypma_008236,Hypma_005776	http://www.kegg.jp/kegg-bin/show_pathway?map00910/K00459%09%23FFFFFF,green/K10534%09%23FFFFFF,green/
ko00010	Glycolysis / Gluconeogenesis	Metabolism	Carbohydrate metabolism	0	3	3	44	0.15318	0.460155	-	Hypma_012533,Hypma_002091,Hypma_015512	http://www.kegg.jp/kegg-bin/show_pathway?map00010/K00129%09%23FFFFFF,green/K00128%09%23FFFFFF,green/K01792%09%23FFFFFF,green/
ko00270	Cysteine and methionine metabolism	Metabolism	Amino acid metabolism	0	3	3	44	0.15318	0.460155	-	Hypma_002605,Hypma_007154,Hypma_010235	http://www.kegg.jp/kegg-bin/show_pathway?map00270/K00838%09%23FFFFFF,green/K00547%09%23FFFFFF,green/K17069%09%23FFFFFF,green/
ko00100	Steroid biosynthesis	Metabolism	Lipid metabolism	1	1	2	24	0.168317	0.460155	Hypma_006711	Hypma_005024	http://www.kegg.jp/kegg-bin/show_pathway?map00100/K00222%09%23FFFFFF,red/K05917%09%23FFFFFF,green/
ko00071	Fatty acid degradation	Metabolism	Lipid metabolism	0	2	2	24	0.168317	0.460155	-	Hypma_012533,Hypma_002922	http://www.kegg.jp/kegg-bin/show_pathway?map00071/K07513%09%23FFFFFF,green/K00128%09%23FFFFFF,green/
ko00430	Taurine and hypotaurine metabolism	Metabolism	Metabolism of other amino acids	1	0	1	6	0.171583	0.460155	Hypma_015552	-	http://www.kegg.jp/kegg-bin/show_pathway?map00430/K00681%09%23FFFFFF,red/
ko00630	Glyoxylate and dicarboxylate metabolism	Metabolism	Carbohydrate metabolism	0	2	2	26	0.190698	0.489181	-	Hypma_007750,Hypma_005309	http://www.kegg.jp/kegg-bin/show_pathway?map00630/K03781%09%23FFFFFF,green/K00122%09%23FFFFFF,green/
ko00511	Other glycan degradation	Metabolism	Glycan biosynthesis and metabolism	1	0	1	8	0.222015	0.530817	Hypma_004042	-	http://www.kegg.jp/kegg-bin/show_pathway?map00511/K01192%09%23FFFFFF,red/
ko00480	Glutathione metabolism	Metabolism	Metabolism of other amino acids	1	1	2	29	0.224922	0.530817	Hypma_015552	Hypma_014954	http://www.kegg.jp/kegg-bin/show_pathway?map00480/K00799%09%23FFFFFF,green/K00681%09%23FFFFFF,red/
ko00330	Arginine and proline metabolism	Metabolism	Amino acid metabolism	0	2	2	31	0.247996	0.541916	-	Hypma_012533,Hypma_001054	http://www.kegg.jp/kegg-bin/show_pathway?map00330/K00819%09%23FFFFFF,green/K00128%09%23FFFFFF,green/
ko00250	Alanine, aspartate and glutamate metabolism	Metabolism	Amino acid metabolism	1	1	2	31	0.247996	0.541916	Hypma_001474	Hypma_006158	http://www.kegg.jp/kegg-bin/show_pathway?map00250/K00814%09%23FFFFFF,red/K00823%09%23FFFFFF,green/
ko00280	Valine, leucine and isoleucine degradation	Metabolism	Amino acid metabolism	0	2	2	35	0.294286	0.59872	-	Hypma_012533,Hypma_002922	http://www.kegg.jp/kegg-bin/show_pathway?map00280/K07513%09%23FFFFFF,green/K00128%09%23FFFFFF,green/
ko00561	Glycerolipid metabolism	Metabolism	Lipid metabolism	0	2	2	35	0.294286	0.59872	-	Hypma_012533,Hypma_009186	http://www.kegg.jp/kegg-bin/show_pathway?map00561/K00128%09%23FFFFFF,green/K00864%09%23FFFFFF,green/
ko00510	N-Glycan biosynthesis	Metabolism	Glycan biosynthesis and metabolism	1	1	2	37	0.317326	0.611626	Hypma_014077	Hypma_007931	http://www.kegg.jp/kegg-bin/show_pathway?map00510/K01230%09%23FFFFFF,red/K00737%09%23FFFFFF,green/
ko00520	Amino sugar and nucleotide sugar metabolism	Metabolism	Carbohydrate metabolism	2	1	3	66	0.333547	0.611626	Hypma_000113,Hypma_001039	Hypma_013835	http://www.kegg.jp/kegg-bin/show_pathway?map00520/K00698%09%23FFFFFF,green/K01183%09%23FFFFFF,red/
ko00130	Ubiquinone and other terpenoid-quinone biosynthesis	Metabolism	Metabolism of cofactors and vitamins	0	1	1	13	0.335159	0.611626	-	Hypma_010235	http://www.kegg.jp/kegg-bin/show_pathway?map00130/K00838%09%23FFFFFF,green/
ko00290	Valine, leucine and isoleucine biosynthesis	Metabolism	Amino acid metabolism	0	1	1	14	0.355746	0.611626	-	Hypma_009550	http://www.kegg.jp/kegg-bin/show_pathway?map00290/K01702%09%23FFFFFF,green/
ko02010	ABC transporters	Environmental Information Processing	Membrane transport	0	1	1	14	0.355746	0.611626	-	Hypma_005009	http://www.kegg.jp/kegg-bin/show_pathway?map02010/K08712%09%23FFFFFF,green/
ko00620	Pyruvate metabolism	Metabolism	Carbohydrate metabolism	0	2	2	41	0.362829	0.611626	-	Hypma_012533,Hypma_002221	http://www.kegg.jp/kegg-bin/show_pathway?map00620/K00029%09%23FFFFFF,green/K00128%09%23FFFFFF,green/
ko00300	Lysine biosynthesis	Metabolism	Amino acid metabolism	0	1	1	15	0.375701	0.615732	-	Hypma_010235	http://www.kegg.jp/kegg-bin/show_pathway?map00300/K00838%09%23FFFFFF,green/
ko00640	Propanoate metabolism	Metabolism	Carbohydrate metabolism	0	1	1	17	0.413789	0.637141	-	Hypma_006158	http://www.kegg.jp/kegg-bin/show_pathway?map00640/K00823%09%23FFFFFF,green/
ko00650	Butanoate metabolism	Metabolism	Carbohydrate metabolism	0	1	1	17	0.413789	0.637141	-	Hypma_006158	http://www.kegg.jp/kegg-bin/show_pathway?map00650/K00823%09%23FFFFFF,green/
ko00400	Phenylalanine, tyrosine and tryptophan biosynthesis	Metabolism	Amino acid metabolism	0	1	1	18	0.43196	0.637141	-	Hypma_010235	http://www.kegg.jp/kegg-bin/show_pathway?map00400/K00838%09%23FFFFFF,green/
ko00600	Sphingolipid metabolism	Metabolism	Lipid metabolism	1	0	1	18	0.43196	0.637141	Hypma_002213	-	http://www.kegg.jp/kegg-bin/show_pathway?map00600/K12350%09%23FFFFFF,red/
ko04933	AGE-RAGE signaling pathway in diabetic complications	Human Diseases	Endocrine and metabolic diseases	0	1	1	19	0.449571	0.646944	-	Hypma_015393	http://www.kegg.jp/kegg-bin/show_pathway?map04933/K04371%09%23FFFFFF,green/
ko00920	Sulfur metabolism	Metabolism	Energy metabolism	0	1	1	21	0.483185	0.67876	-	Hypma_007154	http://www.kegg.jp/kegg-bin/show_pathway?map00920/K17069%09%23FFFFFF,green/
ko00513	Various types of N-glycan biosynthesis	Metabolism	Glycan biosynthesis and metabolism	1	0	1	23	0.514762	0.706301	Hypma_014077	-	http://www.kegg.jp/kegg-bin/show_pathway?map00513/K01230%09%23FFFFFF,red/
ko00030	Pentose phosphate pathway	Metabolism	Carbohydrate metabolism	1	0	1	24	0.529825	0.710447	Hypma_014772	-	http://www.kegg.jp/kegg-bin/show_pathway?map00030/K00616%09%23FFFFFF,red/
ko04213	Longevity regulating pathway - multiple species	Organismal Systems	Aging	0	1	1	28	0.585576	0.751065	-	Hypma_005309	http://www.kegg.jp/kegg-bin/show_pathway?map04213/K03781%09%23FFFFFF,green/
ko00051	Fructose and mannose metabolism	Metabolism	Carbohydrate metabolism	0	1	1	28	0.585576	0.751065	-	Hypma_011596	http://www.kegg.jp/kegg-bin/show_pathway?map00051/K19355%09%23FFFFFF,green/
ko00310	Lysine degradation	Metabolism	Amino acid metabolism	0	1	1	30	0.610939	0.766924	-	Hypma_012533	http://www.kegg.jp/kegg-bin/show_pathway?map00310/K00128%09%23FFFFFF,green/
ko00240	Pyrimidine metabolism	Metabolism	Nucleotide metabolism	0	1	1	32	0.634762	0.780229	-	Hypma_013800	http://www.kegg.jp/kegg-bin/show_pathway?map00240/K00757%09%23FFFFFF,green/
ko03410	Base excision repair	Genetic Information Processing	Replication and repair	0	1	1	38	0.697888	0.840314	-	Hypma_005066	http://www.kegg.jp/kegg-bin/show_pathway?map03410/K10773%09%23FFFFFF,green/
ko00260	Glycine, serine and threonine metabolism	Metabolism	Amino acid metabolism	0	1	1	44	0.750175	0.885207	-	Hypma_004182	http://www.kegg.jp/kegg-bin/show_pathway?map00260/K00108%09%23FFFFFF,green/
ko04111	Cell cycle - yeast	Cellular Processes	Cell growth and death	0	2	2	92	0.783811	0.906762	-	Hypma_013136,Hypma_005760	http://www.kegg.jp/kegg-bin/show_pathway?map04111/K03361%09%23FFFFFF,green/K06666%09%23FFFFFF,green/
ko00500	Starch and sucrose metabolism	Metabolism	Carbohydrate metabolism	0	1	1	57	0.834656	0.9459	-	Hypma_005133	http://www.kegg.jp/kegg-bin/show_pathway?map00500/K05349%09%23FFFFFF,green/
ko03015	mRNA surveillance pathway	Genetic Information Processing	Translation	0	1	1	60	0.849707	0.9459	-	Hypma_006689	http://www.kegg.jp/kegg-bin/show_pathway?map03015/K14326%09%23FFFFFF,green/
ko04120	Ubiquitin mediated proteolysis	Genetic Information Processing	Folding, sorting and degradation	0	1	1	69	0.887175	0.969321	-	Hypma_013136	http://www.kegg.jp/kegg-bin/show_pathway?map04120/K03361%09%23FFFFFF,green/
ko04144	Endocytosis	Cellular Processes	Transport and catabolism	0	1	1	82	0.925523	0.975105	-	Hypma_015819	http://www.kegg.jp/kegg-bin/show_pathway?map04144/K05747%09%23FFFFFF,green/
ko00190	Oxidative phosphorylation	Metabolism	Energy metabolism	0	1	1	82	0.925523	0.975105	-	Hypma_014459	http://www.kegg.jp/kegg-bin/show_pathway?map00190/K02272%09%23FFFFFF,green/
ko04141	Protein processing in endoplasmic reticulum	Genetic Information Processing	Folding, sorting and degradation	1	0	1	92	0.945942	0.979133	Hypma_014077	-	http://www.kegg.jp/kegg-bin/show_pathway?map04141/K01230%09%23FFFFFF,red/
ko03010	Ribosome	Genetic Information Processing	Translation	0	1	1	107	0.966623	0.983289	-	Hypma_007262	http://www.kegg.jp/kegg-bin/show_pathway?map03010/K02974%09%23FFFFFF,green/
ko03013	RNA transport	Genetic Information Processing	Translation	0	1	1	140	0.988521	0.988521	-	Hypma_006689	http://www.kegg.jp/kegg-bin/show_pathway?map03013/K14326%09%23FFFFFF,green/

## Sheet: 90 vs 110
PathwayID	Pathway	Level1	Level2	Up_number	Down_number	DEG_number	total_number	Pvalue	FDR	Up_gene	Down_gene	URL
ko00350	Tyrosine metabolism	Metabolism	Amino acid metabolism	2	4	6	18	3.21265e-05	0.00208822	Hypma_012178,Hypma_015471	Hypma_009660,Hypma_002091,Hypma_006330,Hypma_010235	http://www.kegg.jp/kegg-bin/show_pathway?map00350/K14455%09%23FFFFFF,red/K00129%09%23FFFFFF,green/K00505%09%23FFFFFF,red/K00838%09%23FFFFFF,green/K00451%09%23FFFFFF,green/K00121%09%23FFFFFF,green/
ko01040	Biosynthesis of unsaturated fatty acids	Metabolism	Lipid metabolism	1	4	5	25	0.00200389	0.0651263	Hypma_003909	Hypma_014461,Hypma_003453,Hypma_007284,Hypma_014463	http://www.kegg.jp/kegg-bin/show_pathway?map01040/K10256%09%23FFFFFF,purple/
ko00010	Glycolysis / Gluconeogenesis	Metabolism	Carbohydrate metabolism	1	5	6	44	0.00545639	0.093428	Hypma_009922	Hypma_012533,Hypma_009660,Hypma_002091,Hypma_015512,Hypma_008025	http://www.kegg.jp/kegg-bin/show_pathway?map00010/K00129%09%23FFFFFF,green/K00128%09%23FFFFFF,green/K00121%09%23FFFFFF,green/K01792%09%23FFFFFF,green/K01610%09%23FFFFFF,green/K00161%09%23FFFFFF,red/
ko00360	Phenylalanine metabolism	Metabolism	Amino acid metabolism	2	2	4	20	0.00574942	0.093428	Hypma_003158,Hypma_015471	Hypma_002091,Hypma_010235	http://www.kegg.jp/kegg-bin/show_pathway?map00360/K14455%09%23FFFFFF,red/K00129%09%23FFFFFF,green/K10437%09%23FFFFFF,red/K00838%09%23FFFFFF,green/
ko00340	Histidine metabolism	Metabolism	Amino acid metabolism	1	3	4	22	0.0081896	0.106465	Hypma_014038	Hypma_012533,Hypma_002091,Hypma_016327	http://www.kegg.jp/kegg-bin/show_pathway?map00340/K00129%09%23FFFFFF,green/K00128%09%23FFFFFF,green/K20246%09%23FFFFFF,purple/
ko00680	Methane metabolism	Metabolism	Energy metabolism	0	4	4	24	0.0112253	0.121608	-	Hypma_009660,Hypma_011943,Hypma_007750,Hypma_010797	http://www.kegg.jp/kegg-bin/show_pathway?map00680/K17066%09%23FFFFFF,green/K00122%09%23FFFFFF,green/K00121%09%23FFFFFF,green/
ko00620	Pyruvate metabolism	Metabolism	Carbohydrate metabolism	2	3	5	41	0.0174748	0.162266	Hypma_009922,Hypma_009085	Hypma_012533,Hypma_008025,Hypma_006995	http://www.kegg.jp/kegg-bin/show_pathway?map00620/K00102%09%23FFFFFF,green/K11262%09%23FFFFFF,red/K00128%09%23FFFFFF,green/K01610%09%23FFFFFF,green/K00161%09%23FFFFFF,red/
ko00400	Phenylalanine, tyrosine and tryptophan biosynthesis	Metabolism	Amino acid metabolism	2	1	3	18	0.0278598	0.226361	Hypma_015471,Hypma_000913	Hypma_010235	http://www.kegg.jp/kegg-bin/show_pathway?map00400/K14455%09%23FFFFFF,red/K00838%09%23FFFFFF,green/K01626%09%23FFFFFF,red/
ko00254	Aflatoxin biosynthesis	Metabolism	Biosynthesis of other secondary metabolites	1	0	1	1	0.0374816	0.270701	Hypma_009085	-	http://www.kegg.jp/kegg-bin/show_pathway?map00254/K11262%09%23FFFFFF,red/
ko00100	Steroid biosynthesis	Metabolism	Lipid metabolism	1	2	3	24	0.0587437	0.341652	Hypma_006711	Hypma_005024,Hypma_005054	http://www.kegg.jp/kegg-bin/show_pathway?map00100/K00222%09%23FFFFFF,red/K05917%09%23FFFFFF,green/
ko00053	Ascorbate and aldarate metabolism	Metabolism	Carbohydrate metabolism	1	1	2	12	0.0720175	0.341652	Hypma_013322	Hypma_012533	http://www.kegg.jp/kegg-bin/show_pathway?map00053/K00128%09%23FFFFFF,green/K00103%09%23FFFFFF,red/
ko00791	Atrazine degradation	Metabolism	Xenobiotics biodegradation and metabolism	0	1	1	2	0.0735672	0.341652	-	Hypma_001082	http://www.kegg.jp/kegg-bin/show_pathway?map00791/K06035%09%23FFFFFF,green/
ko00130	Ubiquinone and other terpenoid-quinone biosynthesis	Metabolism	Metabolism of cofactors and vitamins	0	2	2	13	0.0830759	0.341652	-	Hypma_012659,Hypma_010235	http://www.kegg.jp/kegg-bin/show_pathway?map00130/K00838%09%23FFFFFF,green/K06125%09%23FFFFFF,green/
ko00020	Citrate cycle (TCA cycle)	Metabolism	Carbohydrate metabolism	2	1	3	28	0.0854184	0.341652	Hypma_010100,Hypma_009922	Hypma_008025	http://www.kegg.jp/kegg-bin/show_pathway?map00020/K00030%09%23FFFFFF,red/K01610%09%23FFFFFF,green/K00161%09%23FFFFFF,red/
ko04213	Longevity regulating pathway - multiple species	Organismal Systems	Aging	0	3	3	28	0.0854184	0.341652	-	Hypma_015911,Hypma_005922,Hypma_005309	http://www.kegg.jp/kegg-bin/show_pathway?map04213/K01440%09%23FFFFFF,green/K03781%09%23FFFFFF,green/K07827%09%23FFFFFF,green/
ko00040	Pentose and glucuronate interconversions	Metabolism	Carbohydrate metabolism	0	3	3	29	0.0927688	0.341652	-	Hypma_013340,Hypma_012025,Hypma_007173	http://www.kegg.jp/kegg-bin/show_pathway?map00040/K17818%09%23FFFFFF,green/K00008%09%23FFFFFF,green/K01213%09%23FFFFFF,green/
ko00480	Glutathione metabolism	Metabolism	Metabolism of other amino acids	0	3	3	29	0.0927688	0.341652	-	Hypma_010269,Hypma_014954,Hypma_000264	http://www.kegg.jp/kegg-bin/show_pathway?map00480/K00799%09%23FFFFFF,green/
ko02010	ABC transporters	Environmental Information Processing	Membrane transport	0	2	2	14	0.0946112	0.341652	-	Hypma_004975,Hypma_005009	http://www.kegg.jp/kegg-bin/show_pathway?map02010/K08712%09%23FFFFFF,green/
ko00380	Tryptophan metabolism	Metabolism	Amino acid metabolism	0	3	3	32	0.116291	0.386467	-	Hypma_012533,Hypma_005309,Hypma_010235	http://www.kegg.jp/kegg-bin/show_pathway?map00380/K00128%09%23FFFFFF,green/K00838%09%23FFFFFF,green/K03781%09%23FFFFFF,green/
ko00220	Arginine biosynthesis	Metabolism	Amino acid metabolism	2	0	2	16	0.118913	0.386467	Hypma_015692,Hypma_015471	-	http://www.kegg.jp/kegg-bin/show_pathway?map00220/K14455%09%23FFFFFF,red/K00618%09%23FFFFFF,red/
ko00061	Fatty acid biosynthesis	Metabolism	Lipid metabolism	1	1	2	19	0.157771	0.48834	Hypma_009085	Hypma_011936	http://www.kegg.jp/kegg-bin/show_pathway?map00061/K00059%09%23FFFFFF,green/K11262%09%23FFFFFF,red/
ko00410	beta-Alanine metabolism	Metabolism	Metabolism of other amino acids	0	2	2	23	0.21247	0.614954	-	Hypma_012533,Hypma_002091	http://www.kegg.jp/kegg-bin/show_pathway?map00410/K00129%09%23FFFFFF,green/K00128%09%23FFFFFF,green/
ko00071	Fatty acid degradation	Metabolism	Lipid metabolism	0	2	2	24	0.226445	0.614954	-	Hypma_012533,Hypma_009660	http://www.kegg.jp/kegg-bin/show_pathway?map00071/K00128%09%23FFFFFF,green/K00121%09%23FFFFFF,green/
ko00270	Cysteine and methionine metabolism	Metabolism	Amino acid metabolism	2	1	3	44	0.22706	0.614954	Hypma_010575,Hypma_015471	Hypma_010235	http://www.kegg.jp/kegg-bin/show_pathway?map00270/K14455%09%23FFFFFF,red/K00789%09%23FFFFFF,red/K00838%09%23FFFFFF,green/
ko00630	Glyoxylate and dicarboxylate metabolism	Metabolism	Carbohydrate metabolism	0	2	2	26	0.254566	0.653805	-	Hypma_007750,Hypma_005309	http://www.kegg.jp/kegg-bin/show_pathway?map00630/K03781%09%23FFFFFF,green/K00122%09%23FFFFFF,green/
ko04111	Cell cycle - yeast	Cellular Processes	Cell growth and death	5	0	5	92	0.261522	0.653805	Hypma_012420,Hypma_015600,Hypma_007205,Hypma_002158,Hypma_014034	-	http://www.kegg.jp/kegg-bin/show_pathway?map04111/K02537%09%23FFFFFF,red/K02220%09%23FFFFFF,red/K06639%09%23FFFFFF,red/K06678%09%23FFFFFF,red/K06680%09%23FFFFFF,red/
ko00051	Fructose and mannose metabolism	Metabolism	Carbohydrate metabolism	0	2	2	28	0.282761	0.675969	-	Hypma_012025,Hypma_011596	http://www.kegg.jp/kegg-bin/show_pathway?map00051/K00008%09%23FFFFFF,green/K19355%09%23FFFFFF,green/
ko00780	Biotin metabolism	Metabolism	Metabolism of cofactors and vitamins	0	1	1	9	0.291187	0.675969	-	Hypma_011936	http://www.kegg.jp/kegg-bin/show_pathway?map00780/K00059%09%23FFFFFF,green/
ko00330	Arginine and proline metabolism	Metabolism	Amino acid metabolism	1	1	2	31	0.324843	0.703827	Hypma_015471	Hypma_012533	http://www.kegg.jp/kegg-bin/show_pathway?map00330/K14455%09%23FFFFFF,red/K00128%09%23FFFFFF,green/
ko00250	Alanine, aspartate and glutamate metabolism	Metabolism	Amino acid metabolism	2	0	2	31	0.324843	0.703827	Hypma_007578,Hypma_015471	-	http://www.kegg.jp/kegg-bin/show_pathway?map00250/K14455%09%23FFFFFF,red/K01955%09%23FFFFFF,red/
ko00240	Pyrimidine metabolism	Metabolism	Nucleotide metabolism	1	1	2	32	0.338747	0.710276	Hypma_007578	Hypma_013800	http://www.kegg.jp/kegg-bin/show_pathway?map00240/K01955%09%23FFFFFF,red/K00757%09%23FFFFFF,green/
ko00500	Starch and sucrose metabolism	Metabolism	Carbohydrate metabolism	2	1	3	57	0.361068	0.73342	Hypma_010344,Hypma_004313	Hypma_012811	http://www.kegg.jp/kegg-bin/show_pathway?map00500/K01179%09%23FFFFFF,red/K01176%09%23FFFFFF,red/K05349%09%23FFFFFF,green/
ko00561	Glycerolipid metabolism	Metabolism	Lipid metabolism	0	2	2	35	0.379887	0.748262	-	Hypma_012533,Hypma_010586	http://www.kegg.jp/kegg-bin/show_pathway?map00561/K17900%09%23FFFFFF,green/K00128%09%23FFFFFF,green/
ko00670	One carbon pool by folate	Metabolism	Metabolism of cofactors and vitamins	1	0	1	13	0.391874	0.749171	Hypma_009136	-	http://www.kegg.jp/kegg-bin/show_pathway?map00670/K00297%09%23FFFFFF,red/
ko00300	Lysine biosynthesis	Metabolism	Amino acid metabolism	0	1	1	15	0.436752	0.78947	-	Hypma_010235	http://www.kegg.jp/kegg-bin/show_pathway?map00300/K00838%09%23FFFFFF,green/
ko00520	Amino sugar and nucleotide sugar metabolism	Metabolism	Carbohydrate metabolism	2	1	3	66	0.452708	0.78947	Hypma_003279,Hypma_001039	Hypma_014754	http://www.kegg.jp/kegg-bin/show_pathway?map00520/K01209%09%23FFFFFF,purple/K01183%09%23FFFFFF,red/
ko00564	Glycerophospholipid metabolism	Metabolism	Lipid metabolism	2	0	2	42	0.471204	0.78947	Hypma_016006,Hypma_009276	-	http://www.kegg.jp/kegg-bin/show_pathway?map00564/K14676%09%23FFFFFF,red/K00550%09%23FFFFFF,red/
ko00640	Propanoate metabolism	Metabolism	Carbohydrate metabolism	1	0	1	17	0.478339	0.78947	Hypma_009085	-	http://www.kegg.jp/kegg-bin/show_pathway?map00640/K11262%09%23FFFFFF,red/
ko00460	Cyanoamino acid metabolism	Metabolism	Metabolism of other amino acids	0	1	1	17	0.478339	0.78947	-	Hypma_012811	http://www.kegg.jp/kegg-bin/show_pathway?map00460/K05349%09%23FFFFFF,green/
ko03420	Nucleotide excision repair	Genetic Information Processing	Replication and repair	2	0	2	44	0.495816	0.78947	Hypma_006291,Hypma_010077	-	http://www.kegg.jp/kegg-bin/show_pathway?map03420/K02325%09%23FFFFFF,red/K03144%09%23FFFFFF,red/
ko00600	Sphingolipid metabolism	Metabolism	Lipid metabolism	1	0	1	18	0.497973	0.78947	Hypma_002213	-	http://www.kegg.jp/kegg-bin/show_pathway?map00600/K12350%09%23FFFFFF,red/
ko04933	AGE-RAGE signaling pathway in diabetic complications	Human Diseases	Endocrine and metabolic diseases	0	1	1	19	0.516873	0.790439	-	Hypma_005922	http://www.kegg.jp/kegg-bin/show_pathway?map04933/K07827%09%23FFFFFF,green/
ko00910	Nitrogen metabolism	Metabolism	Energy metabolism	0	1	1	20	0.535067	0.790439	-	Hypma_008236	http://www.kegg.jp/kegg-bin/show_pathway?map00910/K00459%09%23FFFFFF,green/
ko00760	Nicotinate and nicotinamide metabolism	Metabolism	Metabolism of cofactors and vitamins	0	1	1	20	0.535067	0.790439	-	Hypma_015911	http://www.kegg.jp/kegg-bin/show_pathway?map00760/K01440%09%23FFFFFF,green/
ko04011	MAPK signaling pathway - yeast	Environmental Information Processing	Signal transduction	1	3	4	108	0.582391	0.809957	Hypma_007205	Hypma_005529,Hypma_012436,Hypma_005309	http://www.kegg.jp/kegg-bin/show_pathway?map04011/K19842%09%23FFFFFF,green/K09051%09%23FFFFFF,green/K02220%09%23FFFFFF,red/K03781%09%23FFFFFF,green/
ko00513	Various types of N-glycan biosynthesis	Metabolism	Glycan biosynthesis and metabolism	1	0	1	23	0.585661	0.809957	Hypma_014078	-	http://www.kegg.jp/kegg-bin/show_pathway?map00513/K01230%09%23FFFFFF,red/
ko00900	Terpenoid backbone biosynthesis	Metabolism	Metabolism of terpenoids and polyketides	1	0	1	23	0.585661	0.809957	Hypma_002631	-	http://www.kegg.jp/kegg-bin/show_pathway?map00900/K00938%09%23FFFFFF,red/
ko00230	Purine metabolism	Metabolism	Nucleotide metabolism	2	0	2	55	0.617556	0.822656	Hypma_013197,Hypma_009223	-	http://www.kegg.jp/kegg-bin/show_pathway?map00230/K00088%09%23FFFFFF,red/K01514%09%23FFFFFF,red/
ko04113	Meiosis - yeast	Cellular Processes	Cell growth and death	2	0	2	59	0.655909	0.822656	Hypma_012420,Hypma_015600	-	http://www.kegg.jp/kegg-bin/show_pathway?map04113/K02537%09%23FFFFFF,red/K06639%09%23FFFFFF,red/
ko04146	Peroxisome	Cellular Processes	Transport and catabolism	0	2	2	59	0.655909	0.822656	-	Hypma_013561,Hypma_005309	http://www.kegg.jp/kegg-bin/show_pathway?map04146/K00624%09%23FFFFFF,green/K03781%09%23FFFFFF,green/
ko03015	mRNA surveillance pathway	Genetic Information Processing	Translation	0	2	2	60	0.665008	0.822656	-	Hypma_015429,Hypma_006689	http://www.kegg.jp/kegg-bin/show_pathway?map03015/K14326%09%23FFFFFF,green/K14404%09%23FFFFFF,green/
ko04141	Protein processing in endoplasmic reticulum	Genetic Information Processing	Folding, sorting and degradation	1	2	3	92	0.677803	0.822656	Hypma_014078	Hypma_000762,Hypma_011697	http://www.kegg.jp/kegg-bin/show_pathway?map04141/K13989%09%23FFFFFF,green/K01230%09%23FFFFFF,red/K13993%09%23FFFFFF,green/
ko00310	Lysine degradation	Metabolism	Amino acid metabolism	0	1	1	30	0.683437	0.822656	-	Hypma_012533	http://www.kegg.jp/kegg-bin/show_pathway?map00310/K00128%09%23FFFFFF,green/
ko03022	Basal transcription factors	Genetic Information Processing	Transcription	1	0	1	30	0.683437	0.822656	Hypma_006291	-	http://www.kegg.jp/kegg-bin/show_pathway?map03022/K03144%09%23FFFFFF,red/
ko00280	Valine, leucine and isoleucine degradation	Metabolism	Amino acid metabolism	0	1	1	35	0.738882	0.873224	-	Hypma_012533	http://www.kegg.jp/kegg-bin/show_pathway?map00280/K00128%09%23FFFFFF,green/
ko00510	N-Glycan biosynthesis	Metabolism	Glycan biosynthesis and metabolism	1	0	1	37	0.758255	0.873495	Hypma_014078	-	http://www.kegg.jp/kegg-bin/show_pathway?map00510/K01230%09%23FFFFFF,red/
ko03410	Base excision repair	Genetic Information Processing	Replication and repair	1	0	1	38	0.767399	0.873495	Hypma_010077	-	http://www.kegg.jp/kegg-bin/show_pathway?map03410/K02325%09%23FFFFFF,red/
ko04138	Autophagy - yeast	Cellular Processes	Transport and catabolism	0	2	2	75	0.779427	0.873495	-	Hypma_010586,Hypma_005922	http://www.kegg.jp/kegg-bin/show_pathway?map04138/K17900%09%23FFFFFF,green/K07827%09%23FFFFFF,green/
ko00190	Oxidative phosphorylation	Metabolism	Energy metabolism	1	1	2	82	0.820096	0.903495	Hypma_010294	Hypma_014459	http://www.kegg.jp/kegg-bin/show_pathway?map00190/K02272%09%23FFFFFF,purple/
ko03030	DNA replication	Genetic Information Processing	Replication and repair	1	0	1	52	0.864566	0.936613	Hypma_010077	-	http://www.kegg.jp/kegg-bin/show_pathway?map03030/K02325%09%23FFFFFF,red/
ko03013	RNA transport	Genetic Information Processing	Translation	1	2	3	140	0.903116	0.962336	Hypma_008646	Hypma_001490,Hypma_006689	http://www.kegg.jp/kegg-bin/show_pathway?map03013/K10577%09%23FFFFFF,green/K14527%09%23FFFFFF,red/K14326%09%23FFFFFF,green/
ko04120	Ubiquitin mediated proteolysis	Genetic Information Processing	Folding, sorting and degradation	0	1	1	69	0.929953	0.972738	-	Hypma_001490	http://www.kegg.jp/kegg-bin/show_pathway?map04120/K10577%09%23FFFFFF,green/
ko03008	Ribosome biogenesis in eukaryotes	Genetic Information Processing	Translation	1	0	1	75	0.944533	0.972738	Hypma_008646	-	http://www.kegg.jp/kegg-bin/show_pathway?map03008/K14527%09%23FFFFFF,red/
ko04144	Endocytosis	Cellular Processes	Transport and catabolism	0	1	1	82	0.957773	0.972738	-	Hypma_008599	http://www.kegg.jp/kegg-bin/show_pathway?map04144/K19366%09%23FFFFFF,green/
ko03010	Ribosome	Genetic Information Processing	Translation	0	1	1	107	0.98412	0.98412	-	Hypma_015486	http://www.kegg.jp/kegg-bin/show_pathway?map03010/K02985%09%23FFFFFF,green/
